1 **Climate change promotes hybridisation between deeply divergent**  
2 **species of European toads**

3  
4 Daniele Canestrelli<sup>a\*</sup>, Roberta Bisconti<sup>a</sup>, Andrea Chiochio<sup>a</sup>, Luigi Maiorano<sup>b</sup>, Mauro  
5 Zampiglia<sup>a</sup>, Giuseppe Nascetti<sup>a</sup>

6  
7 <sup>a</sup>Department of Ecological and Biological Science, University of Tuscia, 01100 Viterbo, Italy.

8 <sup>b</sup>Department of Biology and Biotechnologies “Charles Darwin”, University of Rome “La Sapienza”,  
9 00185 Rome, Italy

10

11

12 \*Correspondence address:

13 Dipartimento di Scienze Ecologiche e Biologiche, Università della Tuscia. Viale dell'Università

14 s.n.c., I-01100 Viterbo, Italy.

15 e-mail: canestrelli@unitus.it

16 phone: +39-0761-357414

17

18 **Abstract**

19 Rare hybridisations between deeply divergent animal species have been reported for decades in a  
20 wide range of taxa, but have often remained unexplained, mainly regarded as chance events and,  
21 as such, reported as anecdotal. Here, we combine field observations with long-term data  
22 concerning natural hybridizations, climate, land-use, and field-validated species distribution  
23 models, for two deeply divergent, naturally sympatric, and occasionally interbreeding toad  
24 species in Europe, belonging to the *Bufo bufo* and *Bufotes viridis* species groups. We show that  
25 climate warming and seasonal extreme temperatures are conspiring to set the scene for these  
26 maladaptive hybridisations, by differentially affecting life-history traits of both species. Our  
27 results identify and provide evidence of an ultimate cause for such events, and reveal that the  
28 potential influence of climate change on interspecific hybridisations goes far beyond closely  
29 related species. Furthermore, climate projections suggest that the chances for these events will  
30 steadily increase in the near future.

31

32 **Running head:** Climate change promotes maladaptive hybridisations

33 **Keywords:** Hybridisation, Climate change, Life-history traits, Pre-mating reproductive barriers.

34

## 35 **Introduction**

36 Hybridisation is a widespread phenomenon in nature (Mallet, 2005), yet the frequency, diversity  
37 of outcomes, underlying mechanisms, its role in the evolutionary process, and how to deal with it  
38 in conservation biology have been controversial topics for more than a century (Arnold, 2006;  
39 Schwenk et al., 2008). Much of our knowledge about the link between hybridisation dynamics in  
40 animals and climate changes, comes from studies of hybrid zones (Hewitt, 2011), where the  
41 reshuffling of species' ranges in response to changing climates brought into contact closely  
42 related and previously allopatric species. Pre-mating reproductive barriers could be incomplete  
43 between these species, and their genomes be still porous to introgression of foreign material,  
44 with several far reaching implications (Mallet, 2005; Arnold, 2006; Schwenk et al., 2008;  
45 Hewitt, 2011). Understandably, species of ancient divergence and with a long-lasting history of  
46 coexistence have contributed the least to this body of knowledge (Mallet, 2005; Schwenk et al.,  
47 2008). These species have had ample opportunity to evolve strong pre-mating reproductive  
48 barriers, either as a by-product of a longer allopatric divergence or because of character  
49 displacement in response to natural selection to lessen reproductive interaction and/or resource  
50 competition (Coyne, 2004; Pfenning and Pfenning, 2009). Consequently, hybridisation events  
51 are extremely improbable between these species, and their observation incidental in the wild.

52 We witnessed to one such events in southern Italy between two toad species, the common  
53 toad *Bufo bufo* and the green toad *Bufo balearicus* (Figure 1). They belong to the *Bufo bufo*  
54 and *Bufo viridis* species groups, whose divergence has been estimated to the Oligocene  
55 (around 20-30 million years ago; Maxson, 1981; Garcia-Porta et al., 2012), and which have  
56 largely overlapping distributions in central, eastern, and southern Europe (Sillero et al., 2014).  
57 Although syntopy is not uncommon, especially in lowland areas, they show distinct spatio-  
58 temporal patterns of habitat use (reviewed in Lanza et al., 2006), making our finding at least

59 three-times unexpected. First, they show markedly different breeding phenologies: *B. bufo* is an  
60 early and explosive breeder, while *B. viridis* is a late and prolonged breeder. Along the Italian  
61 peninsula, breeding activities of *B. bufo* begin earlier in the year (early winter to early spring,  
62 with variation among sites at different altitude and latitude) and usually last 1–2 weeks. *B. viridis*  
63 starts breeding later (middle to late spring), and this activity may last 2–3 months. Furthermore,  
64 breeding activities in syntopic areas have been systematically reported as allochronic, regardless  
65 of intraspecific differences between sites. Second, *B. bufo* and *B. viridis* display differences in  
66 their altitudinal distribution. *B. bufo* breeding sites commonly occurs from 0 to 2000 m above sea  
67 level (MASL), while *B. viridis* shows marked preferences for sites in lowland areas, rarely being  
68 observed above 1000 MASL. Third, in spite of their largely polytopic habits, differences exist in  
69 habitat and breeding site preferences. *B. viridis* favours open areas and bushlands and breeds in  
70 temporary shallow waters, and *B. bufo* most commonly inhabits forested habitats while using  
71 slow running or deeper, wider standing waters as breeding sites.

72 Remarkably, before our observation (May 2014), all these differences applied to toad  
73 populations at our study site. This site is a high-altitude pond (1330 MASL) located at the  
74 margins of a forested area (Figure 2). *B. viridis* was absent at this location and in neighbouring  
75 areas above 800 MASL at least until the year 2007 (Carpino and Capasso, 2008), while breeding  
76 activities of the resident *B. bufo* population were recorded on February of the same year (Carpino  
77 and Capasso, 2008).

78 Here we combine our observation with data from previous reports of similar events in  
79 Europe along the last century. To study the causation of these ‘improbable’ hybridisations, we  
80 adopted an integrative experimental approach, and examined the contribution of multiple factors,  
81 including all those commonly invoked to explain novel interspecific hybridisations among  
82 animal species in the wild.

## 83 **Materials and Methods**

84

### 85 **Assessing natural hybridisation**

86 We visually searched for additional evidence of hybridisation at the breeding pond, for the ten  
87 days immediately following our initial observation of the hybrid couple. Although no further  
88 heterospecific couples were observed, two newly laid egg-strings were found.

89 In order to confirm the hybrid nature of the egg-string laid by the hybrid couple (against the  
90 hypotheses of unfertilised eggs and of undetected homospecific paternity) and to address the  
91 parental species of the other egg-strings, we monitored egg and tadpole development under  
92 laboratory conditions and analysed the pattern of variation of individual larvae at diagnostic  
93 genetic markers.

94 A strip approximately 1.5 m in length was removed from each egg-string and transported  
95 to the laboratory. Tadpoles were reared under standardised light and food conditions, in plastic  
96 boxes (0.8 × 0.5 × 0.2 m) filled with oxygenated tap water. Larval mortality was checked twice  
97 daily, from hatching to metamorphosis.

98 Tadpoles of *B. bufo* and *B. viridis* can be distinguished based on larval morphology  
99 (Ambrogio and Mezzandri, 2014); hybrid tadpoles are usually heavily malformed (Montalenti,  
100 1933; Montalenti, 1932). However, in order to achieve correct identification and to verify the  
101 absence of backcrosses between hybrids and parental individuals, we analysed genetic variation  
102 at the following allozyme loci: malate dehydrogenase (Mdh-1 and Mdh-2; EC 1.1.1.37),  
103 isocitrate dehydrogenase (Icdh-1 and Icdh-2; EC 1.1.1.42), and malate dehydrogenase NADP+-  
104 dependent (Mdhp-1; EC 1.1.1.40). Fifty tadpoles from each egg-string were killed using a 200  
105 mg/L solution of MS222, 10 days after hatching, and then stored at -80°C for subsequent  
106 analyses. The diagnostic value of each allozyme locus was verified through preliminary analyses

107 of 20 individuals per species, sampled from two sites in neighbouring areas, where no evidence  
108 of potential hybridisation had been observed (*B. bufo*: 41.1737° N, 14.5834° E; *B. viridis*:  
109 40.8866° N, 14.9318° E). Standard horizontal starch gel electrophoresis and zymogram  
110 visualisation procedures were carried out, following previously published standard protocols  
111 (Harris and Hopkinson, 1976).

112

### 113 **Quantifying land cover change**

114 In order to assess land cover change as a possible explanation for the hybridisation event  
115 registered in May 2014, in southern Italy, we performed a land use change analysis considering  
116 an area of 119 km<sup>2</sup>, inside the Partenio Regional Park (Regione Campania, Italy). The clearing  
117 where the hybridisation event was registered is located within the internal part of the study area,  
118 approximately 15.6 km from the northern boundary and 2 km from the south-eastern boundary  
119 (Figure 2). A map of the area was sourced using Google Earth Pro 7.1.5.1557 (Google Inc.,  
120 Mountain View, California). By using the “historical imagery” tool, and keeping the extent and  
121 resolution of the map constant, we selected two images: one from 10 October 2014, a few  
122 months after the hybridisation event, and one from 31 October 2006, a few months before the  
123 last record indicating an absence of *B. viridis* from the site (Carpino and Capasso, 2008). The  
124 two images were imported into ArcGIS 10.3.1 (ESRI ©), with a resolution of 4.5 m per pixel,  
125 and were georeferenced using administrative boundaries as reference points (RMS error = 6.23  
126 m for the 2014 image; RMS error = 4.48 m for the 2006 image). The images were interpreted  
127 using direct recognition (Campbell, 1978), considering five easily recognisable land use classes  
128 that hold a clear ecological importance for both toad species: agriculture, forests, natural  
129 clearings, natural vegetation (other than forests), and artificial. For both images, a vector layer  
130 (format shapefile, ESRI ©) was produced at a 1:25.000 scale. To perform the land cover change

131 analysis, as per (Falcucci et al., 2007), each vector layer was transformed into a raster layer  
132 considering 4 different pixel resolutions: 25 m, 50 m, 75 m, and 100 m. The change detection  
133 analysis was performed for each pixel resolution, resulting in an average percentage change for  
134 every land cover class.

135

### 136 **Climate influence on altitudinal distribution pattern**

137 Based on historical records of occurrence, and considering the species' altitudinal distributions in  
138 peninsular Italy (Carpino and Capasso, 2008; Guarino et al., 2012; Lanza et al., 2007), the  
139 presence of a *B. bufo* population at the study site was an expected finding, whereas the presence  
140 of *B. viridis* was not expected, either at this site or within neighbouring, high altitude areas.  
141 Therefore, we focused subsequent analyses on the latter species.

142 To address the plausibility of climate forcing on recent altitudinal distribution changes for  
143 *B. viridis*, we calibrated a correlative distribution model for the species in peninsular Italy. The  
144 models were calibrated considering six bioclimatic variables considered important for the  
145 species: temperature seasonality, mean temperature of the warmest quarter, mean temperature of  
146 the coldest quarter, temperature annual range, precipitation seasonality, and precipitation of the  
147 coldest quarter. We obtained all climate variables at 1 km resolution from WORLDCLIM  
148 (Hijmans et al., 2005), which provide an interpolation of climate observation representative of  
149 1950–2000. To obtain the average climate variables for the 2007–2013 time frame, we followed  
150 the procedure presented in (Maiorano et al., 2013) and considered the data available from the  
151 Climatic Research Unit of the University of East Anglia (database: CRU TS3.22; Harris et al.,  
152 2014), which provided monthly temperature and precipitation values with a spatial resolution of  
153  $50 \times 50$  km. To downscale from the resolution of the CRU database to the  $1 \text{ km}^2$  of the  
154 WORLDCLIM database, we first calculated climate anomalies by contrasting monthly

155 temperature and precipitation values for 2007–2013 against the 1950–2000 climate data, as  
156 obtained from the same CRU TS3.22 database. Anomalies were calculated as absolute  
157 temperature difference ( $\Delta^{\circ}\text{C}$ ) and relative precipitation differences (% change). By using bilinear  
158 resampling, we downscaled the anomalies to  $0.0083^{\circ}$  of spatial resolution ( $\approx 1\text{-km}$ ). Then, in  
159 order to obtain monthly maps of temperature and precipitation for 2007–2013, we applied the  
160 anomaly corrections to the 1950–2000 climate layers. Finally, we calculated all the derived  
161 climate maps mentioned above. The bioclimatic layers for 2070–2100 were obtained directly at  
162 the resolution of  $1\text{ km}^2$  from the WORLDCLIM database, and considered 3 emission scenarios  
163 (A1B, A2, and B1), and many different global circulation models (24 GCMs for the A1B  
164 emission scenario, 19 GCMs for A2, and 18 GCMs for B1) developed under IPCC4 (IPCC,  
165 2007).

166 To calibrate the models, we used the ensemble forecasting approach (Araújo and New,  
167 2007) implemented in BIOMOD, a bioclimatic niche modelling package for the R environment  
168 (Thuiller et al., 2009). We used the following eight models: (i) generalised linear models, (ii)  
169 generalised additive models, (iii) classification tree analysis, (iv) artificial neural networks, (v)  
170 generalised boosted models, (vi) random forests, (vii) flexible discriminant analysis, and (viii)  
171 multivariate adaptive regression spline. All models were calibrated considering the entirety of  
172 peninsular Italy south of the Po river ( $212,460\text{ km}^2$ ), with 350 points of presence collected before  
173 2000, plus 10,000 background points. All models were evaluated using a repeated split-plot  
174 procedure (70% of the data used for calibration, 30% left apart for evaluation; the entire  
175 procedure repeated 10 times for each model (Thuiller et al., 2009), and by measuring the area  
176 under the receiver operating characteristic (ROC) curve (AUC) (Swets, 1988). All models with  
177 AUC values greater than 0.745 were projected over the entire study area using the 1950–2000  
178 climate layers, as well as the 2007–2013, and 2070–2100 climate layers. We measured the



179 minimum probability of presence obtained in correspondence of the available points of presence  
180 for 1950–2000, and we used this threshold to define areas of species absence (all areas below  
181 this minimum threshold) in all periods considered. Moreover, considering 100 m wide elevation  
182 classes, we calculated average probability of presence for all three periods, and obtained a model  
183 of the probability of presence for *B. viridis* along the elevation range in peninsular Italy (Figure  
184 3).

185 We further investigated the plausibility of a link between climate change and altitudinal  
186 shifts by turning the model prediction into a working hypothesis. Based on this prediction (see  
187 Results and Discussion), we selected a geographic area close to our study site, and carried out  
188 field searches for further, unprecedented sites of occurrence of *B. viridis*, above 1200 MASL. To  
189 select the geographic area, we adopted the following criteria: (i) location on a mountain massif,  
190 as close as possible to our study site; (ii) presence of potential breeding sites at altitudes  $\geq 1200$   
191 MASL; (iii) *B. viridis* populations reported at lower altitudes; (iv) absence of obvious  
192 anthropogenic habitat discontinuities between low and high altitude areas. Accordingly, we  
193 identified the Picentini Mountains (within the Picentini Mountains Regional Park, roughly  
194 located 25 Km southeast of our study site) as an area of best fit for our criteria. Field searches  
195 began on 2 May 2015, and lasted until the first evidence of *B. viridis* in the area was found (21  
196 May). The rationale underlying this experimental integration was as follows: although failure to  
197 identify new high altitude sites of occurrence would not be strong evidence against a role of  
198 climate change in promoting altitudinal shifts at lake Campo Maggiore, or elsewhere, a positive  
199 result would provide support for the model prediction, and therefore, support the hypothesis that  
200 our initial finding belongs to a suite of events promoted by climate change.

201

202 **Climate influence on breeding phenology**

203 Our finding of the hybrid couple in May 2014 suggests delayed breeding activity of *B. bufo*  
204 within the usual breeding period of *B. viridis* (Lanza et al., 2006; Carpino and Capasso, 2008;  
205 Guarino et al., 2012), a pattern shared by most previous observation (Vlček, 1997; Lang, 1926;  
206 Vlček, 1995; Zavadil and Roth, 1997; Duda, 2008). Therefore, subsequent analyses were focused  
207 on *B. bufo*. Notably, while there is strong evidence for a link between the breeding phenology of  
208 *B. bufo* and annual temperature cycles (Reading, 1998; Reading, 2003; Tryjanowski et al., 2003),  
209 the same does not hold true for *B. viridis*.

210 A search of academic and grey literature revealed five additional observations of hybrid  
211 couples, at four geographic sites (see Figure 3): two located in the Czech Republic (Vlček, 1997;  
212 Lang, 1926; Vlček, 1995; Zavadil and Roth, 1999), one in Sweden (Lang, 1926), and one in  
213 Austria (Duda, 2008).

214 The annual activity cycle of *B. bufo* populations can be affected by several environmental  
215 features, including climate, and the five sites (including our observation) span a wide range of  
216 latitudes. Thus, rather than considering average winter temperatures, we based our analysis on  
217 the period when this species begins its breeding activity in each area, according to regional  
218 atlases and databases (Guarino et al., 2012; Nečas et al., 1997; Cabela and Grillitsch, 1997;  
219 Gilsen and Kauri, 1959). In addition, previous studies suggested that the beginning of this  
220 activity is linked to the average temperatures of the preceding 1–2 months (Reading, 1998).  
221 Therefore, in our testing for a link between hybridisation events and climate anomalies, we set  
222 the period of interest to the two months preceding the usual start of the breeding activity, for  
223 each geographic area. Accordingly, we analysed date ranges covering December to January for  
224 the site in south-central Italy, January to February for the sites in Czech Republic and Austria,  
225 and February to March for the site in Sweden.

226 Long-term climate data for our study site were provided, by the Montevergine Observatory  
227 (40.9360° N; 14.7288° E), as monthly averages since the year 1884. In order to gain climate data  
228 for the four sites of past hybridisation, we searched the NOAA database (available at  
229 <http://gis.ncdc.noaa.gov>) of monthly observational data using the following two criteria: (i)  
230 climate station closest to the site of interest and (ii) time series of at least 40 years before the year  
231 of the observed hybridisation event. The following stations best matched these search criteria:  
232 Koebenhavn Landbohojskolen, Denmark (Id: DA000030380; Latitude: 55.683° N; Longitude:  
233 12.533° E); Praha Klementinum, Czech Rep. (Id: EZE00100082; Latitude: 50.090° N;  
234 Longitude: 14.419° E); Wien, Austria (Id: AU000005901; Latitude: 48.233° N; Longitude:  
235 16.35° E); OravskaLesna, (Id: LOE00116364; Latitude: 49.366° N; Longitude: 19.166° E).

236 For each climatic series retrieved, we analysed bimonthly average temperatures along both the  
237 entire temporal series, and the 10 years preceding the hybridisation event, i.e. a time-lapse  
238 approximating the lifetime climatic experience of the ‘average’ toad in the wild (Lanza et al.,  
239 2006).

240 To test the null hypothesis that an association between hybridisation events and climate  
241 anomalies was due to chance alone, we carried out binomial probability tests. We set the  
242 probability threshold of a single event to 0.02, based on the highest value calculated for the ratio  
243 between year rank (mildest = 1st rank) and climatic series length (i.e. the first out of 47 available  
244 years from the climatic station DA000030380). Since hybridisation events were both spatially  
245 and temporally distant, data independence was assumed. However, to err on the side of caution,  
246 we carried out the analyses considering the two observations in eastern Czech Republic, as both  
247 independent and fully dependent (i.e. as a single observation), then took the highest value as the  
248 confidence level for accepting/rejecting the null hypothesis.

249 Finally, the paucity of hybridisation events recorded qualifies these events as rare, and  
250 testifies to the strength of the pre-mating isolation mechanisms. On the other hand, given such  
251 rareness, we cannot exclude the occurrence of potentially unobserved, unreported, or undetected  
252 events. Thus, we explored how potentially unrecorded events could affect the significance of our  
253 test. To this aim, we carried out additional binomial probability tests by progressively increasing  
254 the number of events while leaving the number of ‘successes’ unchanged. The null hypotheses of  
255 no association was rejected at the nominal probability threshold  $\alpha = 0.05$ .

256

## 257 **Results and Discussion**

258

259 At the time of our observation, we counted 9 males, 3 females and 8 juveniles (22-26 mm long;  
260 presumably 1 year old) of *B. viridis*, plus 2 female *B. bufo*, and various newly spawned egg-  
261 strings. Tadpoles from the putatively hybrid egg-string were identified as first-generation hybrids  
262 by their heterozygote status at all loci analysed. All other individuals analysed were homozygotic  
263 for the respective diagnostic allele at each locus, and were thus identified as belonging to  
264 parental species. Therefore, no further data analysis was carried out on the multilocus genotypes.  
265 In line with previous findings (Montalenti, 1933; Montalenti, 1932), most hybrid tadpoles were  
266 heavily malformed (see Figure 1), and none reached the metamorphosis, whereas tadpoles from  
267 homospecific pairs did not show abnormalities, neither in the external morphology nor in the  
268 ontogenetic pathway.

269 Despite their wide sympatry, ease of observation, and more than a century-old knowledge  
270 of hybridisation in laboratory crosses, our literature searches for previous reports of interspecific  
271 breeding couples in the wild, identified just 5 additional observations within a 94-year time span  
272 (Vlček, 1997; Lang, 1926; Vlček, 1995; Zavadil and Roth, 1997; Duda, 2008).

273 Three main hypotheses have been invoked to explain recently established interspecific  
274 hybridisations among animal species, and may have played a role in the present case by  
275 promoting syntopy and breeding season overlap (Chunco, 2014; Crispo et al., 2011): species  
276 translocations, anthropogenic habitat degradation (a derivation of the Anderson's 'hybridisation  
277 of the habitat' model; Anderson, 1948) and climate changes.

278 In the case of *B. bufo* and *B. viridis*, a species translocation can be firmly excluded in all  
279 the reported cases, based on the extensive knowledge of their natural geographic distributions  
280 (Sillero et al., 2014; Lanza et al., 2006), as well as on the fossil data of both species in Europe  
281 (Martin and Sanchiz, 2011).

282 Anthropogenic habitat degradation has been proposed as a main causative agent in some  
283 case (Duda, 2008). By reducing the diversity and number of potential breeding sites in a given  
284 area, physical alterations of habitat could promote syntopy of previously allotopic populations of  
285 *B. bufo* and *B. viridis*. Although plausibly contributing, this hypothesis cannot explain the entire  
286 pattern, and it does not apply to all cases. Our study site (but see also Zavadil and Roth, 1997) is  
287 located within a protected area established in 1993, and an analysis of contemporary and  
288 historical aerial photos of this site and neighbouring areas clearly show the absence of any  
289 physical alterations of potential relevance for the two species (Figure 2). Moreover, habitat  
290 degradation could not explain the overlap of the two breeding seasons. Climate changes,  
291 however, significantly improve our ability to explain the occurrence of hybridisation events  
292 between these species.

293 By promoting a recent altitudinal migration of *B. viridis* from neighbouring, lower altitude  
294 sites, the ongoing climate warming engendered the unexpected syntopy at our study site. Support  
295 this argument (the only alternative to recent translocation), comes from our models of the  
296 distribution of *B. viridis* in peninsular Italy, based on a set of known occurrences collected before

297 year 2000, and projected to the average climate over the period 2007-2013. Indeed, our models  
298 indicated that the species' presence above 1200 MASL was highly improbable under pre-2000  
299 climate, but became plausible during 2007-2013 (Figure 3). Furthermore, projecting the models  
300 under future climate projections for the time period 2070-2100 under different emission  
301 scenarios the general pattern remains unchanged, but with an even higher probability of presence  
302 above 1200 MASL (results not shown). The reliability of the models was clearly confirmed by  
303 the field-validation procedure (see Methods). Indeed, our field searches of *B. viridis* at high-  
304 altitude sites of predicted presence in post-2000 projections were successful. We found a  
305 previously unreported site of occurrence within the Picentini Mountains (Latitude: 40.8251°N;  
306 Longitude: 14.9864°E; roughly 25 Km south-east of the study site), thus confirming that upward  
307 migrations of *B. viridis* are ongoing, as predicted by our bioclimatic model (see also Zavadil and  
308 Roth, 1997).

309 Besides being a co-factor, priming syntopy, climate changes also contributed to  
310 hybridisation events by promoting an overlap of the breeding activities. Analysing long-climate  
311 series, we found that the years when hybridisation events were observed in Europe (including  
312 our observation) ranked 1st or 2nd hottest on record at each site, over time series from 47 to 214  
313 years-long. Moreover, bimonthly mean temperatures at these sites were 2.4 to 5.5 °C above the  
314 1961-1990 averages, and 1.9 to 4.3 °C above the preceding 10-years averages (Figure 3).  
315 Binomial probability tests allowed us to reject the null hypothesis of random association between  
316 hybridisation events and extremely mild winters, with very high confidence (binomial  
317 probability:  $P \leq 2.3 \times 10^{-6}$ ). Also, additional binomial probability tests, carried out in order to  
318 explore how unrecorded events could affect the significance of our test, indicated that the null  
319 hypothesis of random association was rejected (at  $\alpha = 0.05$ ) until the number of events was  $\geq 77$ ,  
320 while leaving unchanged the number of 'successes'.

321 Although *B. bufo* is expected to bring forward its breeding activity after mild winters  
322 (Reading, 1998; Reading, 2003; Tryjanowski et al., 2003), at least three lines of support may  
323 help explaining this apparently counterintuitive pattern. In years when the breeding season  
324 begins earlier (after a mild winter), breeding has been observed to last longer (Gittins et al.,  
325 1980). Furthermore, a second and lower peak of breeding activity has been often observed later  
326 in the season (Reading, 1998; Pages, 1984), especially after mild winters (Reading, 1998).  
327 Finally, extensive ecophysiological investigations on bufonid toads, including *B. bufo*, indicate  
328 that increased temperatures during hibernation lead to significant alterations of several processes  
329 affecting the breeding activity, including body size condition, annual ovarian cycle, and seasonal  
330 synchronisation of breeding (Jørgensen, 1992).

331 Our analyses do not indicate climate change as the single explanatory factor. The  
332 environmental contexts in which interspecific interactions occur and the diverse forms of habitat  
333 disturbance might be locally influential. Nonetheless, these analyses clearly show that climate  
334 changes played a fundamental part in promoting hybridisation events. In light of the direction of  
335 these changes (IPCC, 2014), and of the results of our modelling exercise, we hypothesise that  
336 these events will become progressively more common in the near future. Most importantly, our  
337 results reveal a wider potential influence of climate changes on interspecific reproductive  
338 interactions, particularly in the many instances where climate-driven allochrony and/or allotopy  
339 are integral components of the reproductive isolating barriers.

340 Hybridisation events among non-closely related species are generally believed to yield  
341 events that are transient, and potentially affecting local population demography at most, because  
342 strongly maladaptive (Malone and Fontnot, 2008; Rhymer and Simberloff, 1996). Nevertheless,  
343 there may be exceptions, whereby the effects of maladaptive processes propagate from  
344 population to community level (Farkas, 2015). Moreover, as revealed by years of investigation

345 on the hybridisation process in several animal taxa, including amphibians, new evolutionary  
346 pathways have been sometime opened by such rare and maladaptive events (Arnold, 2006).

347



348 **References**

349

350 Ambrogio, A., Mezzadri S., 2014. *Girini d'Italia –Tadpoles of Italy*. Gavia Edizioni, Piacenza.

351 Anderson, E. 1948. Hybridization of the habitat. *Evolution* **2**:1-9.

352 Araújo, M.B., New M. 2007. Ensemble forecasting of species distributions. *Trends in Ecology*  
353 *and Evolution* **22**:42-47.

354 Arnold, M.L. 2006. *Evolution Through Genetic Exchange*. Oxford University Press, Oxford.

355 Cabela, A., H. Grillitsch, Tiedemann, F. 2001. *Atlas zur Verbreitung und Ökologie der*  
356 *Amphibien und Reptilien in Österreich*. Naturhistorischen Museums, Wien.

357 Campbell, J.B. 1978. A geographical analysis of image interpretation methods. *Professional*  
358 *Geographer* **30**:264-269.

359 Carpino, F., Capasso, S. 2008. *I vertebrati terrestri del Parco regionale del Partenio*. Edizioni  
360 Scientifiche Italiane, Napoli.

361 Chunco, A.J. 2014. Hybridization in a warmer world. *Ecology and Evolution* **4**:2019-2031.

362 Coyne, J.A., Orr. H.A. 2004. *Speciation*. Sinauer Associates, Sunderland.

363 Crispo, E., Moore, J.S., Lee-Yaw, J.A., Gray, S.M., Haller, B.C. 2011. Broken barriers:  
364 human-induced changes to gene flow and introgression in animals. *BioEssays* **33**:508-518.

365 Duda, M. 2008. First record of a natural male hybrid of *Bufo (Pseudepidalea) viridis* Laurenti,  
366 1768 and *Bufo (Bufo) bufo* Linnaeus, 1758 from Austria. *Herpetozoa* **20**:184-186.

367 Falcucci, A., Maiorano, L, Boitani. L. 2007. Changes in land-use/land-cover patterns in Italy and  
368 their implications for biodiversity conservation. *Landscape Ecology* **22**, 617-631.

369 Farkas, T.E., Hendry, A.P., Nosil, P., Beckerman. A.P. 2015. How maladaptation can structure  
370 biodiversity: eco-evolutionary island biogeography. *Trends in Ecology and Evolution* **30**:154-  
371 160.

- 372 Garcia-Porta, A.J., Litvinchuk, S.N., Crochet, P.A., Romano, A., Geniez, P.H., Lo-Valvo, M.,  
373 Lymberakis, P., Carranza, S. 2012. Molecular phylogenetics and historical biogeography of  
374 the west-palearctic common toads (*Bufo bufo* species complex). *Molecular Phylogenetics*  
375 *and Evolution* **63**:113-130.
- 376 Gilsen, T., Kauri, H. 1959. Zoogeography of the Swedish amphibians and reptiles.  
377 *Actavertebratica* **1**:191-397.
- 378 Gittins, S.P., Parker, A.G., Slater, F.M. 1980. Population characteristics of the common toad  
379 (*Bufo bufo*) visiting a breeding site in mid-Wales. *Journal of Animal Ecology* **49**:161-173.
- 380 Guarino, F.M., Aprea, G., Caputo, V., Maio, N., Odierna G., Picariello, O. 2012. *Atlante degli*  
381 *Anfibi e dei Rettili della Campania*. Massa Editore, Napoli.
- 382 Harris, H., Hopkinson, D.A. 1976. *Handbook Of Enzyme Electrophoresis In Human Genetics*.  
383 Elsevier/North-Holland, New York.
- 384 Harris, I., Jones, P.D., Osborn, T.J., Lister, T.H. 2014. Updated high resolution grids of monthly  
385 climatic observation: the CRU TS3.1 dataset. *International Journal of Climatology* **34**:623-  
386 642.
- 387 Hewitt, G.M. 2011. Quaternary phylogeography: the roots of hybrid zones. *Genetica* **139**:617-  
388 638.
- 389 Hijmans, R.J., Cameron, S.E. Parra, J.L., Jones, P.G., Jarvis, A. 2005. Very high resolution  
390 interpolated climate surfaces for global land areas. *International Journal of Climatology*  
391 **25**:1965–1978.
- 392 Intergovernmental Panel on Climate Change. *Climate change 2007: the physical science basis*.  
393 *Contribution of Working Group I to the Fourth Assessment Report of the IPCC*. Cambridge  
394 University Press, Cambridge, 2007.

- 395 IPCC, 2014: Climate Change 2014: Synthesis Report. Contribution of Working Groups I, II and  
396 III to the Fifth Assessment Report of the Intergovernmental Panel on Climate Change [Core  
397 Writing Team, R.K. Pachauri and L.A. Meyer (eds.)]. IPCC, Geneva, Switzerland, 151 pp.
- 398 Jørgensen, C.B. 1992. Growth and reproduction. In *Environmental Physiology of the Amphibians*  
399 (eds Feder, M., and W. Burggren,). University of Chicago Press, Chicago.
- 400 Lang, K. 1926. Groddjurens och kraldjurens utbredning inom Bara harad (Malmohuslan). *Fauna*  
401 *och Flora Uppsala* 145-150.
- 402 Lanza, B., Andreone, F., Bologna, M.A., Corti, C., Razzetti, E. 2007. *Amphibia—Fauna d’Italia,*  
403 *Vol XLII.* Calderini Editore, Bologna.
- 404 Lanza, B., Nistri, A., Vanni, S. 2006. *Iconography of Italian Amphibia.* Grandi e Grandi editori,  
405 Modena.
- 406 Maiorano, L., Cheddadi, R., Zimmermann, N.E., Pellissier, L., Petitpierre, B., Pottier, J.,  
407 Laborde, H., Hurdu, B.I., Pearman, P.B., Psomas, A., Singarayer, J.S., Broennimann, O.,  
408 Vittoz, P., Dubuis, A., Edwards, M.E., Binney, H.A., Guisan, A. 2013. Building the niche  
409 through time: using 13,000 years of data to predict the effects of climate change on three tree  
410 species in Europe. *Global Ecology and Biogeography* **22**:302-317.
- 411 Mallet, J. 2005. Hybridization as an invasion of the genome. *Trends in Ecology and Evolution*  
412 **20**:229–237.
- 413 Malone, J.H., Fontenot, B.E. 2008 Patterns of Reproductive Isolation in Toads. *PLoS ONE*  
414 **3**:e3900.
- 415 Martín, C., Sanchiz, B. 2011. *Lisanfos KMS. Version 1.2.* Museo Nacional de Ciencias  
416 Naturales, Madrid, Spain.
- 417 Maxson, L.R. 1981. Albumin evolution and its phylogenetic implications in toads of the genus  
418 Bufo. II. Relationships among Eurasian Bufo. *Copeia* **3**:579-583.

- 419 Montalenti, G. 1932. Sull'embriogenesi degli ibridi di *Bufo vulgaris* e *Bufo viridis*. Rendiconti  
420 dell'Accademia Nazionale dei Lincei, Classe di Scienze Fisiche, Matematiche e Naturali,  
421 Roma, 15:994-1000.
- 422 Montalenti, G. 1933. L'ontogenesi degli ibridi fra *Bufo vulgaris* e *Bufo viridis*. *Physiological*  
423 *zoology* **6**:329-395.
- 424 Nečas, P., Modrý, D., Zavadil, V. 1997. *Czech Recent and Fossil Amphibians and Reptiles: Atlas*  
425 *and Field Guide*. Edition Chimaira, Frankfurt Am Main.
- 426 Pages, J.M. 1984. Ecologie des amphibiens du sud-ouest de la Montagne Noire. *Alytes* **3**:56-69.
- 427 Pfennig, K.S., Pfennig, D. 2009. Character displacement: ecological and reproductive responses  
428 to a common evolutionary problem. *The Quarterly Review of Biology* **84**:253-276.
- 429 Reading, C.J. 1998. The effect of winter temperatures on the timing of breeding activity in the  
430 common toad *Bufo bufo*. *Oecologia* **117**:469-475.
- 431 Reading, C.J. 2003. The effects of variation in climatic temperature (1980–2001) on breeding  
432 activity and tadpole stage duration in the common toad, *Bufo bufo*. *Science of The Total*  
433 *Environment* **310**:231-236.
- 434 Rhymer, J.M., Simberloff, D. 1996. Extinction by hybridization and introgression. *Annual*  
435 *Review of Ecology, Evolution, and Systematics* **27**:83-109.
- 436 Schwenk, K., Brede, N., Streit, B. 2008. Introduction. Extent, processes and evolutionary impact  
437 of interspecific hybridization in animals. *Philosophical Transactions of the Royal Society B*  
438 **363**:2805-2811.
- 439 Sillero, N., Campos, J., Bonardi, A., Corti, C., Creemers, R., Crochet, P.A., Isailovic, J.C.,  
440 Denoël, M., Ficetola, G.F., Gonçalves, J., Kuzmin, S., Lymberakis, P., de Pous, P.,  
441 Rodríguez, A., Sindaco, R., Speybroeck, J., Toxopeus, B., Vieites, D.R., Vences, M. 2014.

- 442 Updated distribution and biogeography of amphibians and reptiles of Europe. *Amphibia-*  
443 *Reptilia* **35**:1-31.
- 444 Swets, J.A. 1988. Measuring the accuracy of diagnostic systems. *Science* **240**:1285–1293.
- 445 Thuiller, W. Lafourcade, B. Engler, R., Araujo, M.B. 2009. BIOMOD: a platform for ensemble  
446 forecasting of species distributions. *Ecography* **32**:369–373.
- 447 Tryjanowski, P., Rybacki, M., Sparks, T. 2003 Changes in the first spawning dates of common  
448 frogs and common toads in western Poland in 1978—2002. *Annales Zoologici*  
449 *Fennici* **40**:459–464.
- 450 Vlček, P. 1995. Mexidruhový amplexus ropuch. *Živa* **43**:83.
- 451 Vlček, P. 1997. Poznatky z křížení ropuchy obecné s ropuchou zelenou. *Živa* **45**:132-133.
- 452 Zavadíl, V., Roth, P. 1997 Natural hybridisation between *Bufo viridis* and *Bufo bufo* in the  
453 Douposkéhory hills (northwest Bohemia, Czech Republic) with general comments on  
454 hybridisation of European green and common toads. In *Herpetologiabonnensis* (eds Böhme,  
455 W., W. Bischoff, T. Ziegler) Proceedings of the 8th Ordinary General Meeting of the  
456 Societas Europaea Herpetologica, Bonn.
- 457

458 **Acknowledgments**

459 We thank Maurizio Severini and Graziano Crasta for statistical advice, Vincenzo Capozzi for  
460 providing climatic data for the Montevergine Observatory, and Paola Arduino for providing  
461 support during laboratory procedures.

462

463 **Conflict of interest**

464 The authors have no conflict of interests to declare.

465

466

467 **Figures**

468

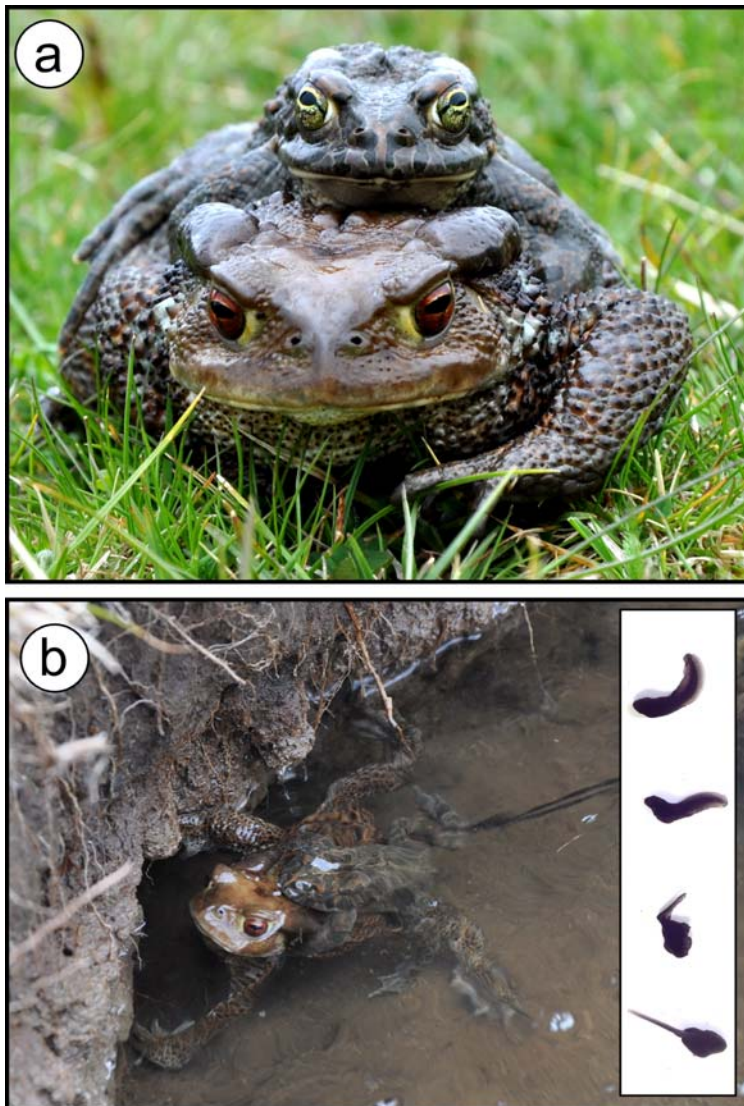

469

470 **Figure 1.** Interspecific hybridisation between the common toad (*Bufo bufo*) and the Balearic  
471 green toad (*Bufotes balearicus*) in the wild. The hybrid couple (a) was found spawning (b) on 10  
472 May 2014, at lake Campo Maggiore, a high-elevation pond within the Partenio Regional Park,  
473 southern Italy (latitude: 40.9429° N; longitude: 14.7096° E; altitude: 1330 MASL). The majority  
474 of tadpoles from the hybrid egg-string reared under standard laboratory conditions were heavily  
475 malformed (inset), and none survived until the metamorphosis stage; this pattern was not  
476 observed for control tadpoles from co-specific mates of both species.

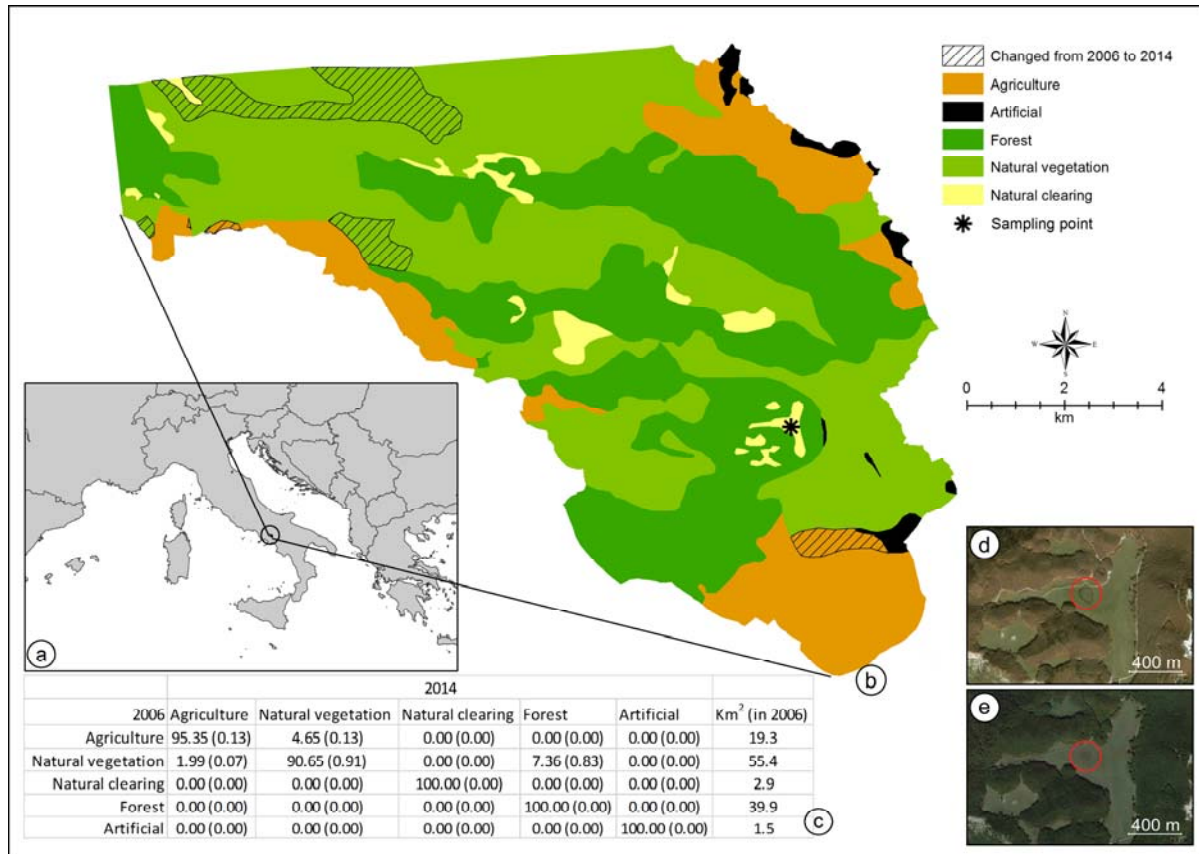

477

478 **Figure 2.** Land-use change detection analysis. (a) Location of the study area in Italy. (b) map of  
 479 the land use in 2006, as obtained from direct interpretation of an aerial photo collected on 31  
 480 October 2006; in the same map, the exact location where the hybridisation event has been  
 481 registered is indicated, as well as all areas where land use was different when compared to a  
 482 second aerial photo collected on 9 October 2014. Both aerial photos were obtained from Google  
 483 Earth Pro 7.1.5.1557 (Google Inc., Mountain View, California). (c) Average percent change  
 484 (range of percent change in parenthesis) in land use classes from 2006 to 2014; total km<sup>2</sup> area for  
 485 each land cover class in 2006 is provided in the last column. Aerial photos of the breeding site  
 486 and its neighbourhoods collected on 31 October 2006 (d), and 9 October 2014 (e).

487

488

489



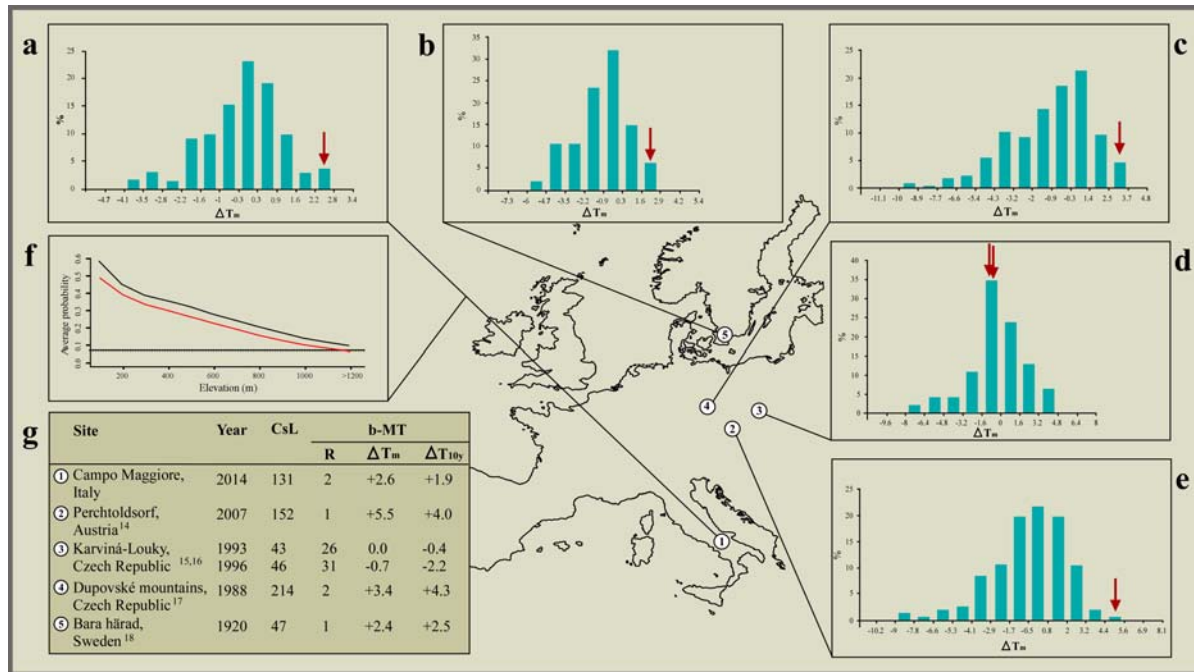

490

491 **Figure 3.** Climate correlates of the interspecific hybridisation events observed in the wild  
492 between the common toad (*Bufo bufo*) and the Balearic green toad (*Bufo balearicus*). Bar  
493 plots showing frequency distribution (percent) of bimonthly mean temperature deviations ( $\Delta T_m$ )  
494 from the 1961–1990 average, compared to the two months preceding the breeding activity at  
495 each geographic region: (a) December to January, (b) February to March, and (c–e) January to  
496 February. Values for the years when hybrid mates were observed are marked using red arrows.  
497 Optimal bar width was computed for each climatic series following the Freedman–Diaconis rule.  
498 (f) average probability of presence vs elevation at sea level (m) as modelled for the pre-2000  
499 climate (red line), and for the 2007–2013 climate (solid black line); the black dotted line  
500 indicates the minimum plausible level of probability of presence, above which the species can be  
501 considered present, while below is considered absent. (g) Mean temperature data for each site,  
502 and year of observation of interspecific mates. CsL: climatic series length, in years, before the  
503 observed event; b-MT: bimonthly mean temperature; R: rank over the entire climatic series (1=  
504 mildest);  $\Delta T_m$ : deviation from the 1961–1990 average temperature ( $^{\circ}\text{C}$ );  $\Delta T_{10y}$ : deviation from  
505 the preceding 10-year average temperature ( $^{\circ}\text{C}$ ).
